# Supplementary material for: The IRE1β-mediated unfolded protein response is repressed by the chaperone AGR2 in mucin producing cells
Source: Springer Nature journal article supplement (doi:10.1038/s44318-023-00014-z), 2023-12-18
Supplement: MOESM11 [file 44318_2023_14_MOESM11_ESM.pdf]

## Expanded View Figures

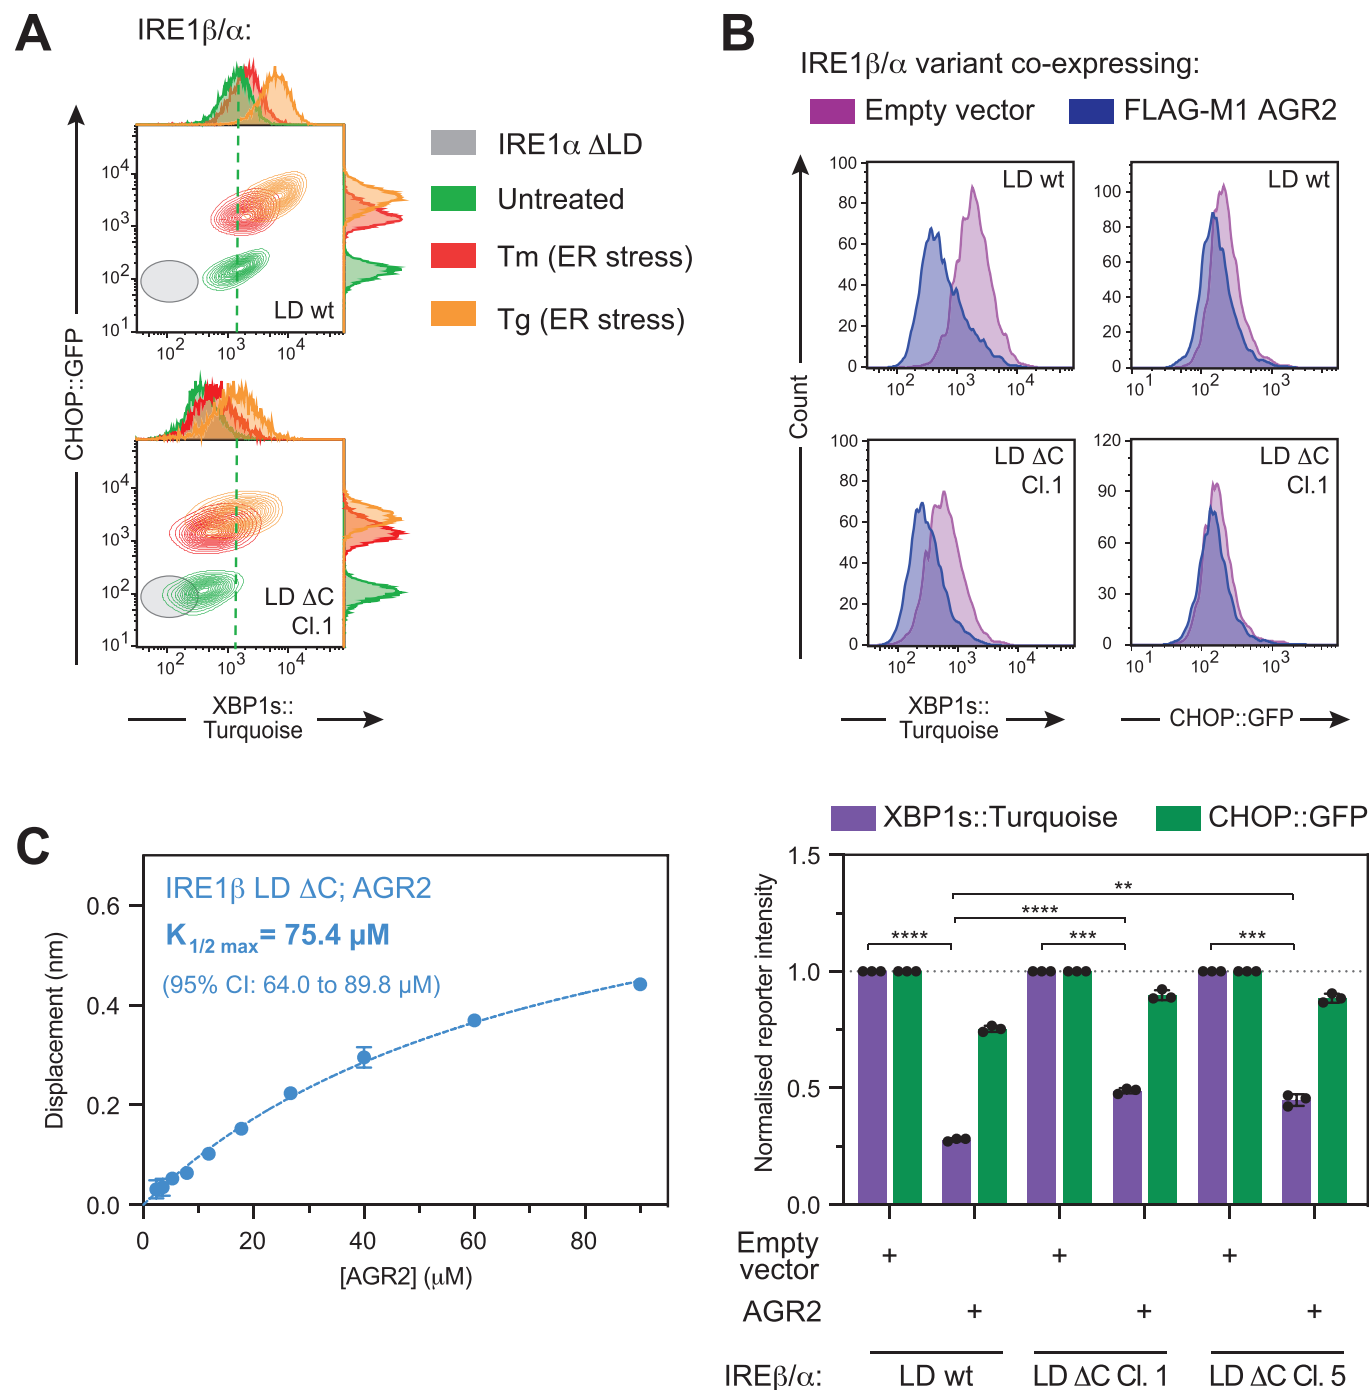

**Figure EV1. IRE1 $\beta$  luminal domain (LD) cysteines are dispensable to its interaction with AGR2.**

(A) Two-dimensional contour plot of CHOP::GFP and XBP1s::Turquoise signals from dual UPR reporter CHO cells expressing an IRE1 $\beta/\alpha$  chimera wild-type (wt) or mutant version lacking the two cysteines of the IRE1 $\beta$  LD [LD  $\Delta$ C Clone (Cl.) 1] from the endogenous *ERN1* locus. Where indicated cells were treated with the ER stressors tunicamycin (Tm) or thapsigargin (Tg). For reference, the signal of the IRE1 $\alpha$   $\Delta$ LD parental cells is indicated in grey. Representative plot of three independent experiments is shown. (B) Upper panel: Histograms of CHOP::GFP and XBP1s::Turquoise signal from cells described in (A) transiently transfected with FLAG-M1-AGR2. Lower panel: Bar diagram of the mean  $\pm$  SD of the indicated signal from three independent repetitions of the experiment shown in the upper panel. Statistical analysis was performed by two-sided unpaired Welch's t test and significance is indicated by asterisks (\*\* $P$  < 0.01, \*\*\* $P$  < 0.001, \*\*\*\* $P$  < 0.0001). (C) Bio-Layer Interferometry (BLI)-derived signal from an IRE1 $\beta$  LD  $\Delta$ C probe as a function of concentration of interacting AGR2 fitted to a one-site specific binding function with the indicated confidence interval (CI). Shown are the mean  $\pm$  SD of three independent repetitions.

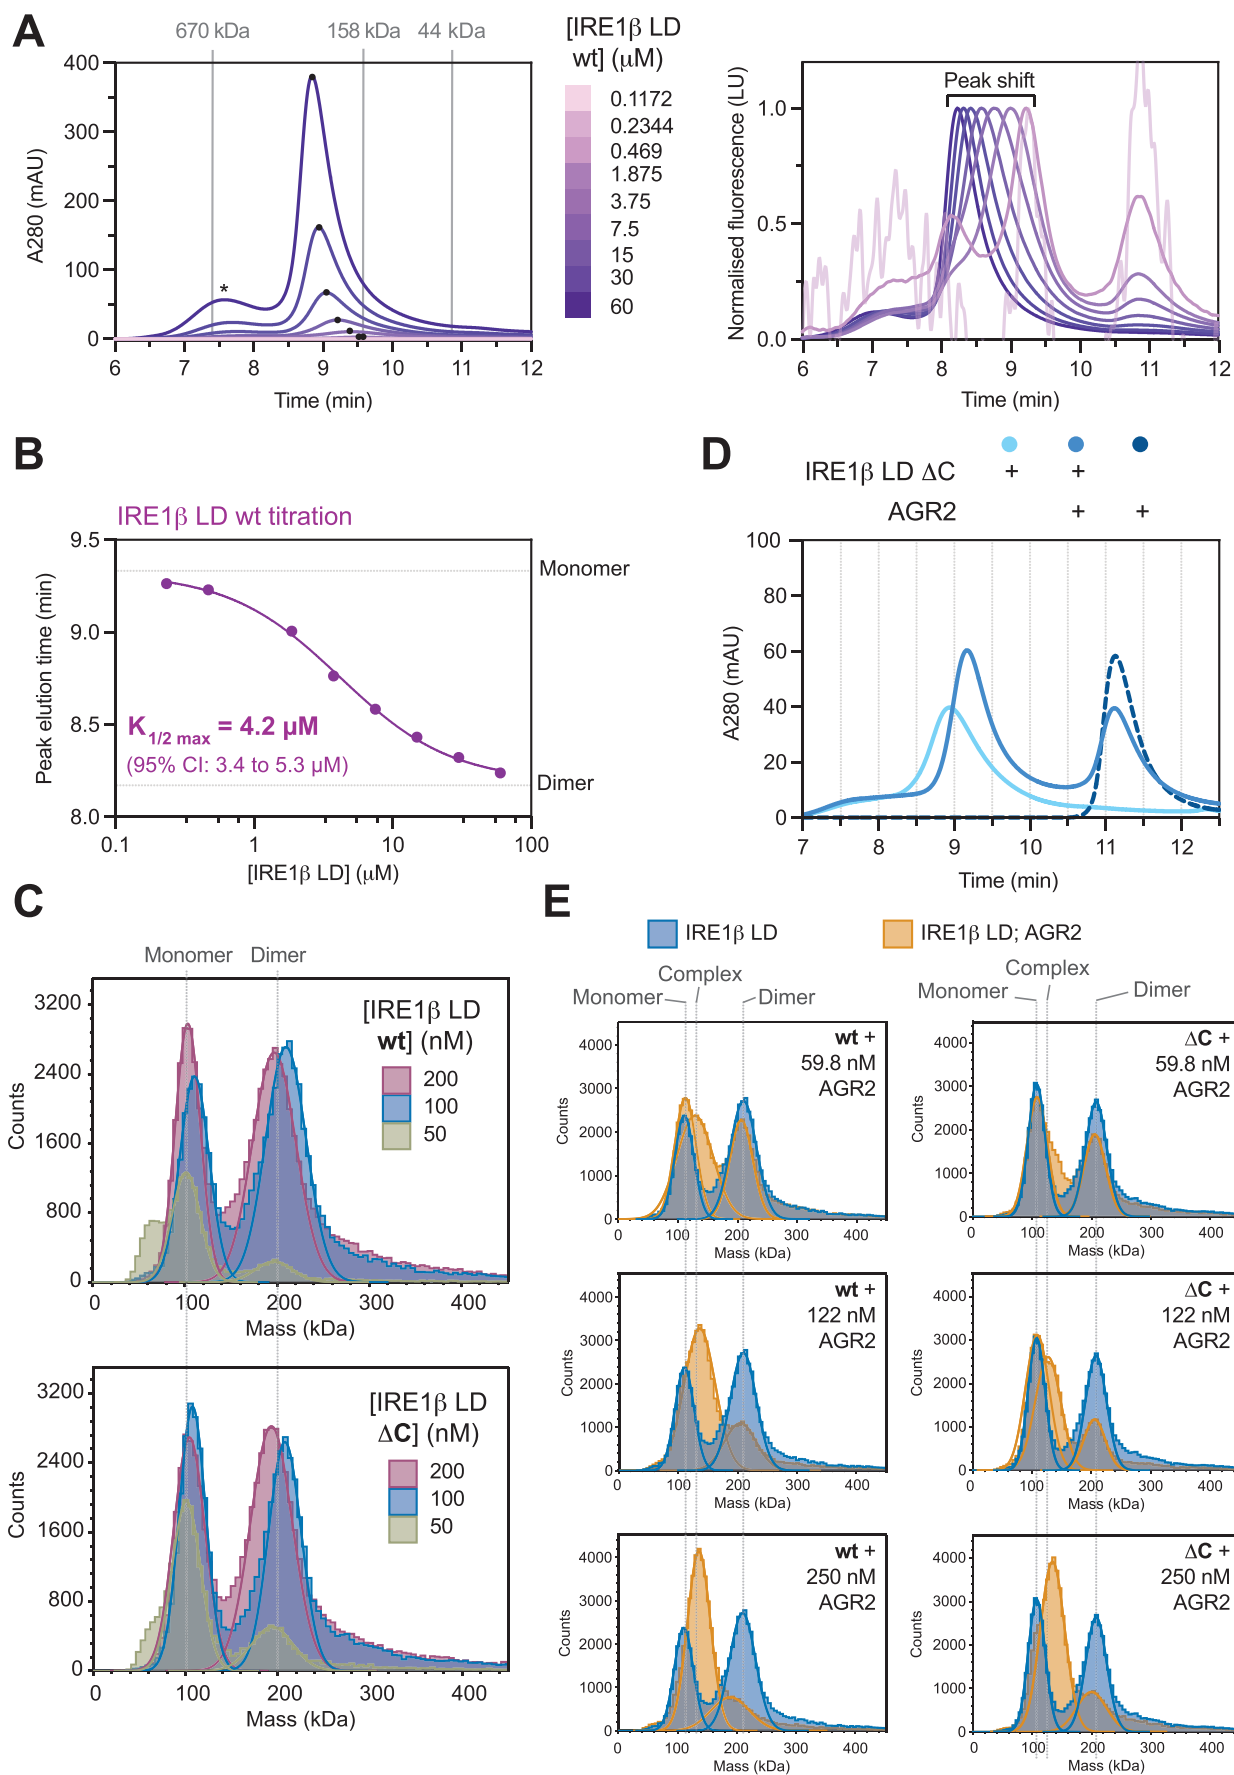

◀ **Figure EV2. Both, wild-type (wt) IRE1 $\beta$  luminal domain (LD) and a cysteine-lacking mutant ( $\Delta$ C), exist in a monomer-dimer equilibrium which is shifted towards the monomeric species in presence of AGR2.**

(A) Left panel: Size-exclusion chromatography (SEC) elution profiles of IRE1 $\beta$  LD samples at the indicated concentrations. The asterisk (\*) marks a high molecular weight species that is a purification artefact as it was not in equilibrium with the main peak. Right panel: Normalised fluorescence trace of the same samples, plotted against peak elution signal. (B) Plot of the relation of peak elution time and protein concentration of IRE1 $\beta$  LD from (A) fitted to a sigmoidal function with the indicated confidence interval (CI). (C) Histograms of mass photometric analysis of IRE1 $\beta$  LD wt or LD  $\Delta$ C at the indicated concentrations. Note that the molecular mass of the monomer is 116 kDa, since IRE1 $\beta$  LD variants were expressed as fusion proteins with maltose binding protein and GFP. (D) SEC protein absorbance as in (A) of GFP-tagged IRE1 $\beta$  LD lacking its cysteines ( $\Delta$ C) with and without AGR2. Representative plot of three independent experiments is shown. (E) Histograms as in (C) of 100 nM IRE1 $\beta$  LD wt or  $\Delta$ C in presence and absence of the indicated concentrations of AGR2.

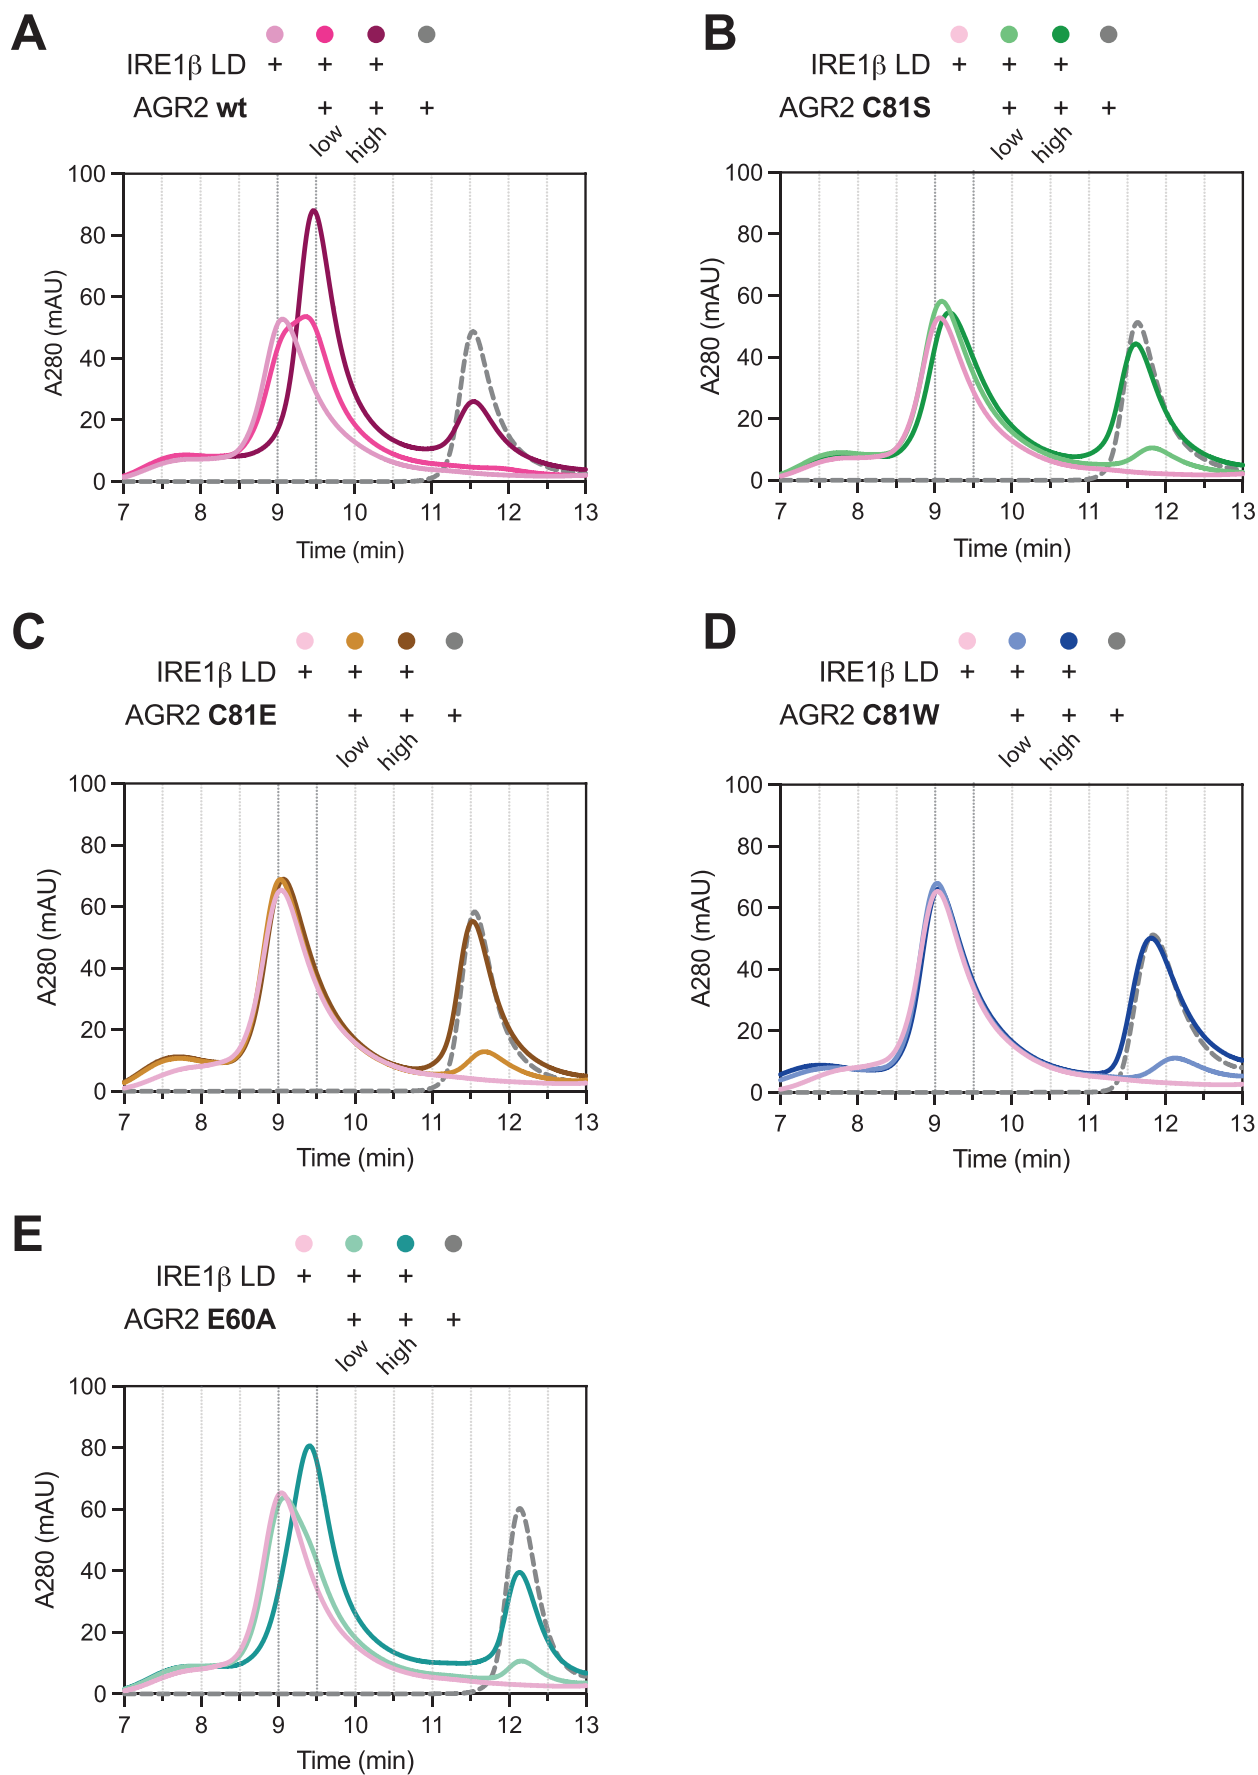

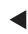**Figure EV3. Active-site mutations impair AGR2's effect on the oligomeric state of IRE1 $\beta$ 's luminal domain (LD) in vitro.**

(A–E) Size-exclusion chromatography (SEC) elution profiles of IRE1 $\beta$  LD (15  $\mu$ M) incubated with 10  $\mu$ M (low) or 50  $\mu$ M (high) of wild-type (wt) or mutant AGR2. AGR2 E60A is a monomeric mutant previously described in (Patel et al, [2013](#)).

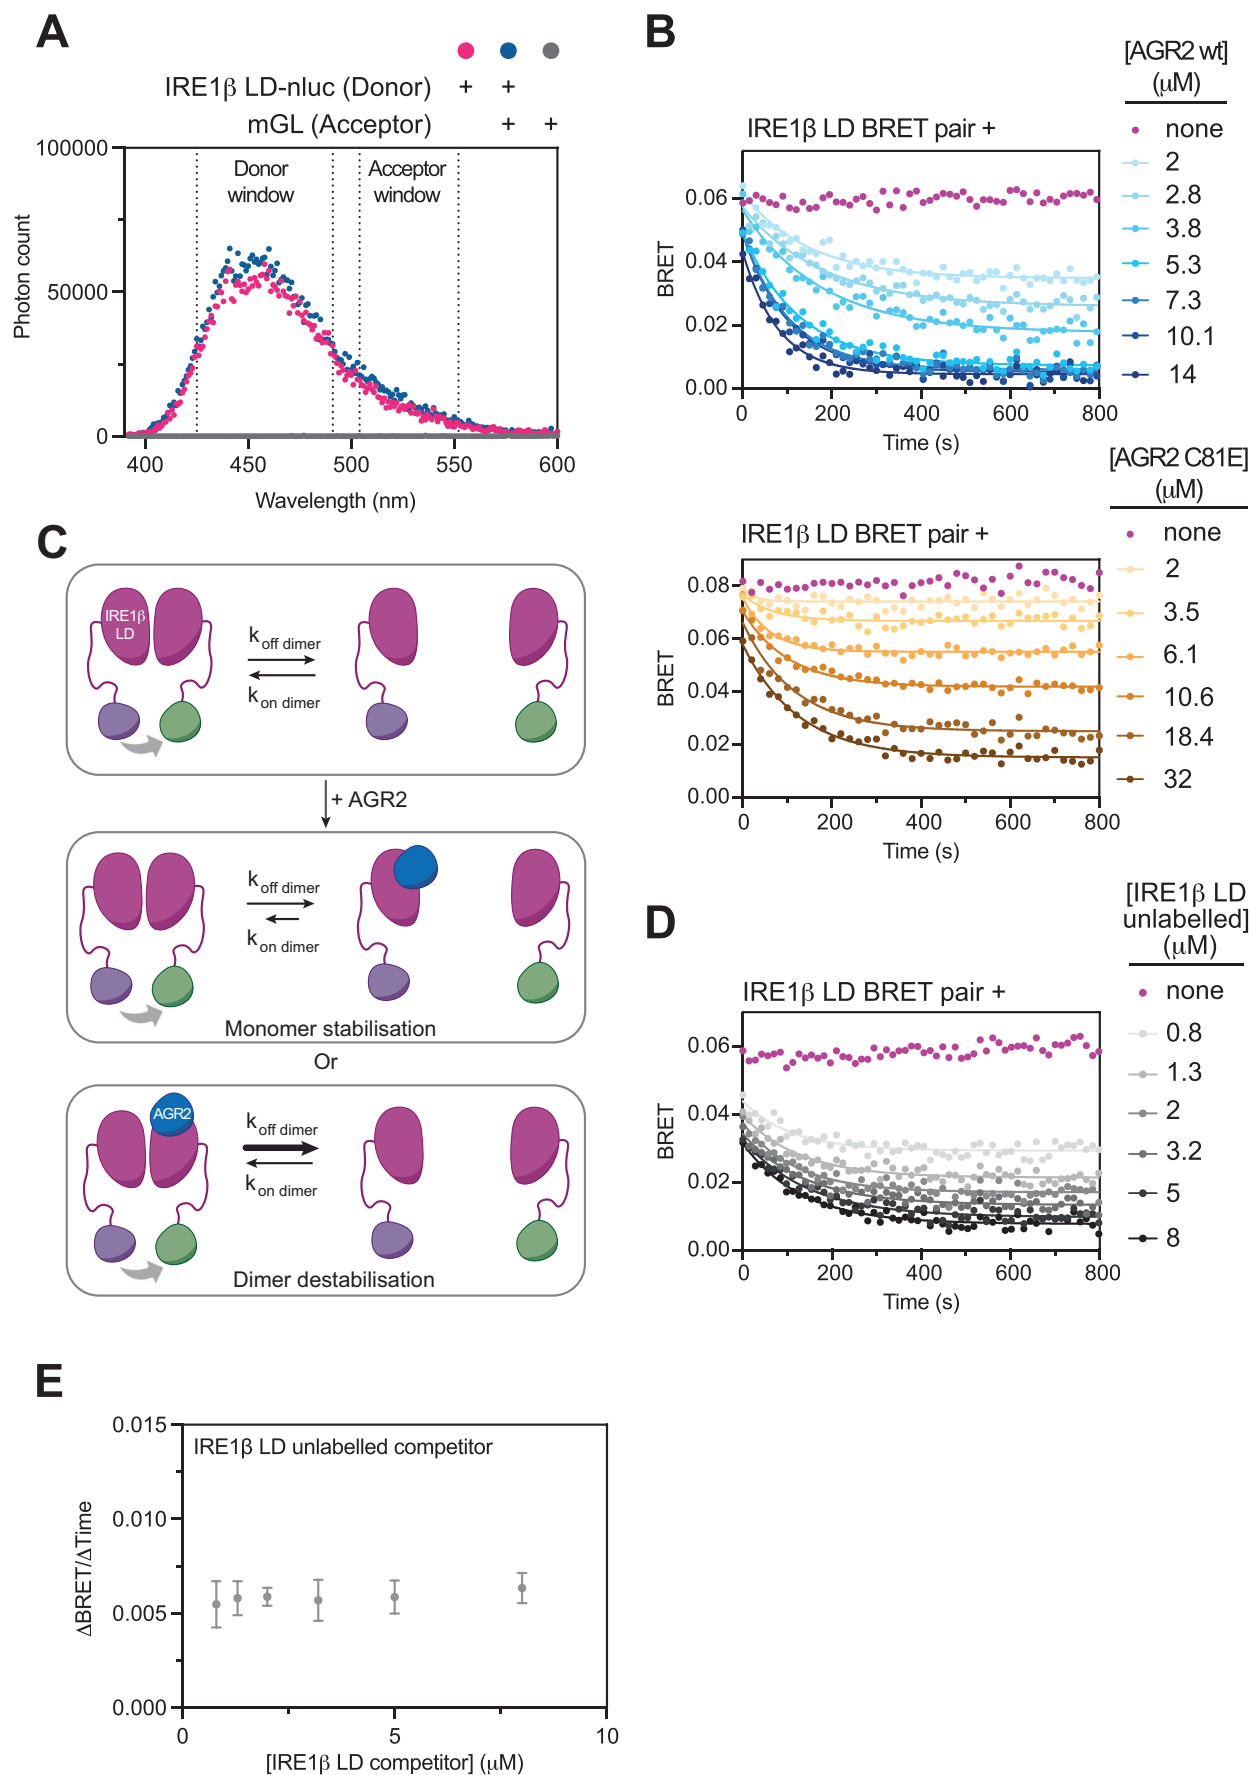

**Figure EV4. Kinetics of IRE1 $\beta$  luminal domain (LD) dimerisation and AGR2's effect on it probed by bioluminescence resonance energy transfer (BRET).**

(A) Spectral scan as in Fig. 6B, with free monomeric Green Lantern (mGL) as an acceptor. (B) Plot of time-dependent change in IRE1 $\beta$  LD dimerisation-induced BRET following introduction of wild-type (wt) AGR2 and AGR2 C81E mutant, respectively. Traces were fitted to a one-phase exponential decay and parameters used to obtain reaction variables plotted in Fig. 6C, E. (C) Schematic depiction of IRE1 $\beta$  LD's monomer-dimer equilibrium. Two hypothetical components to AGR2 action are presented: AGR2 can bind to monomeric IRE1 $\beta$  LD and prevent re-dimerisation, resulting in decreased dimerisation on-rates. Whereas active destabilisation of dimeric IRE1 $\beta$  LD upon AGR2 binding would increase the 'off-rate' of the dimer. (D) As in (B) but following introduction of an unlabelled IRE1 $\beta$  LD competitor. (E) Plot of the rate of BRET decrease as a function of concentration of unlabelled IRE1 $\beta$  LD competitor. Shown are the mean  $\pm$  SD of three independent repetitions.

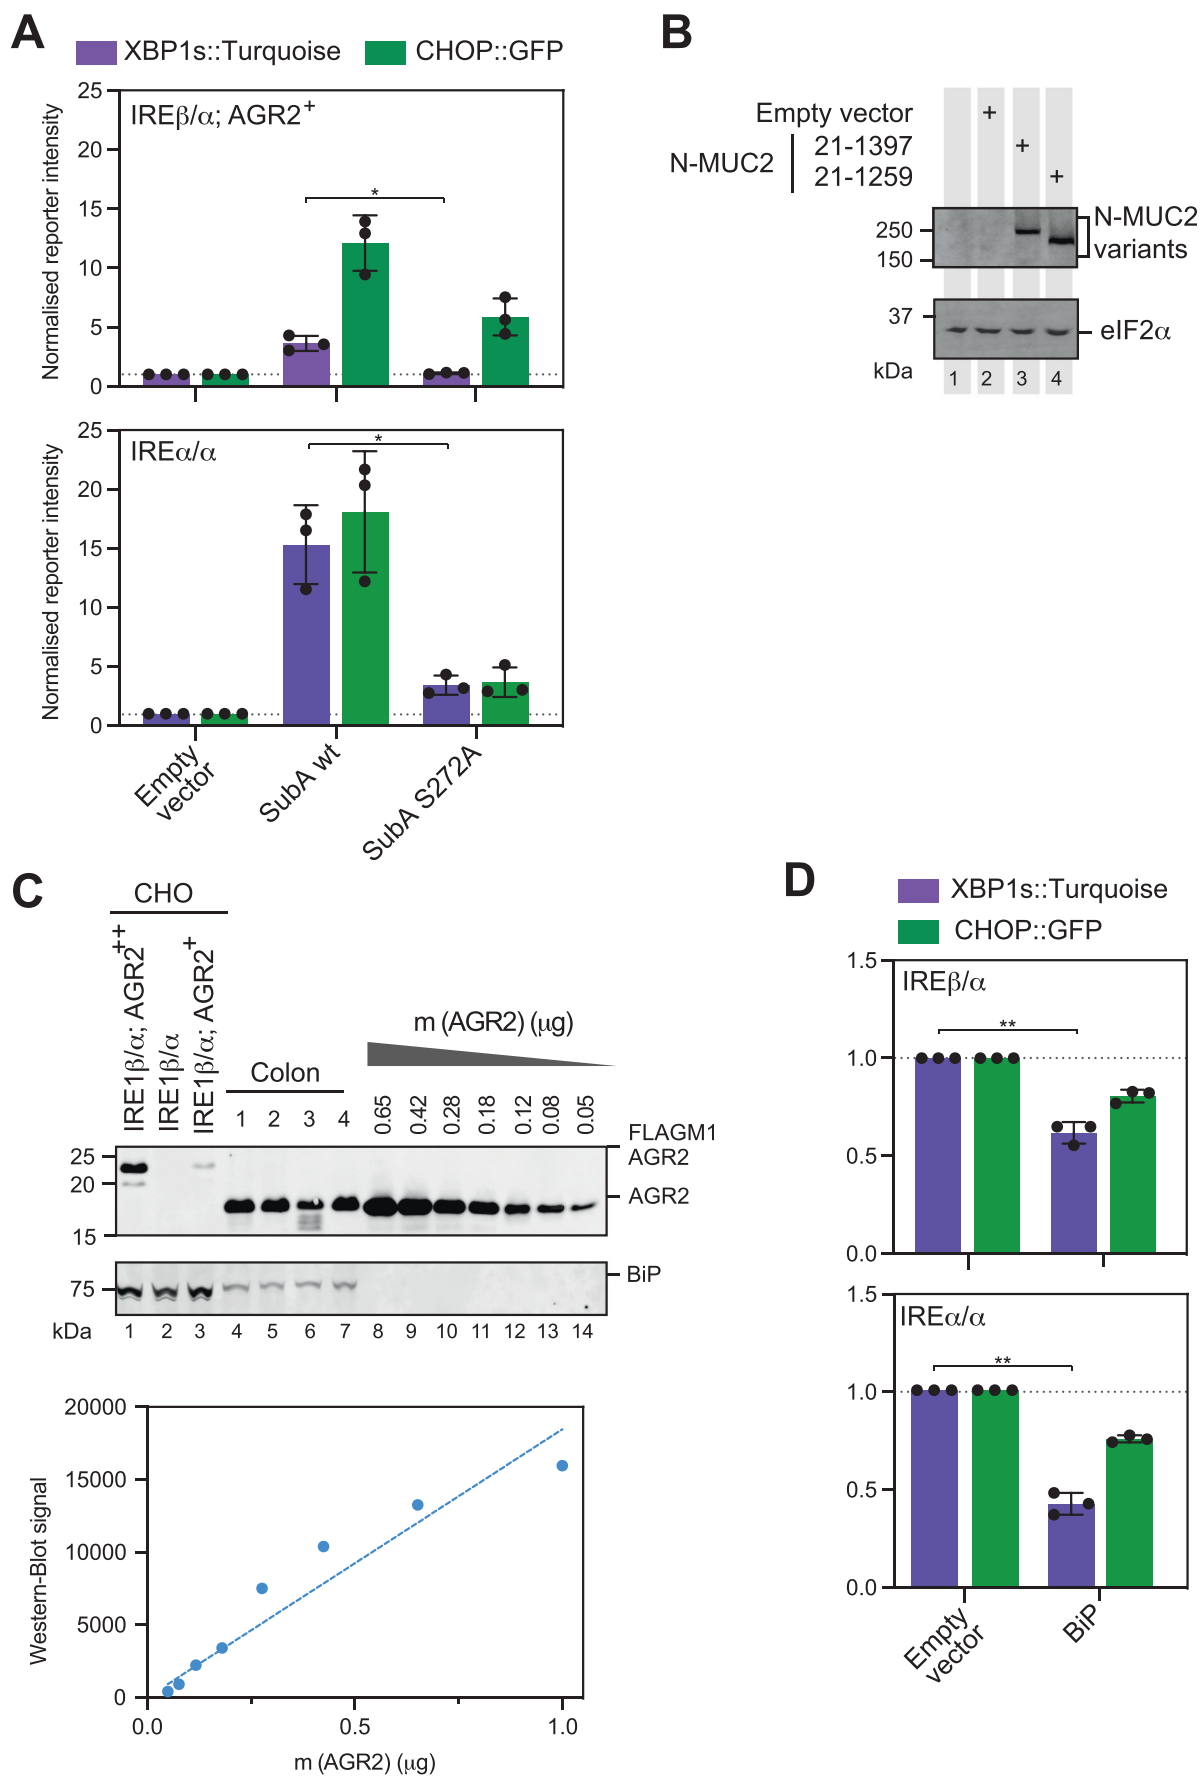



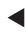

#### Figure EV5. Expression of MUC2 fragments and AGR2.

(A) Quantification of reporter signals from IRE1 $\beta$ /α; AGR2<sup>+</sup> and IRE1α/α expressing dual UPR reporter cells transiently transfected with SubA variants (mCherry as expression marker). The inactive SubA S272A mutant was used as control. Shown are the mean  $\pm$  SD of three independent repetitions. Statistical analysis was performed by two-sided unpaired Welch's *t* test and significance is indicated by asterisks (\**P* > 0.1). (B) Representative immunoblot of IRE1 $\beta$ /α; AGR2 cells transiently transfected with the indicated MUC2 variants (from Fig. 7C, D). (C) Upper panel shows quantitative immunoblotting (using known quantities of purified bacterially expressed AGR2 to calibrate the assay) of AGR2 the indicated CHO cell lines and mouse colonic lysates. Lower panel shows calibration curve derived from known quantities of purified AGR2. Data points were fitted to a linear function. Assuming that 50% of the mass recovered from the colonic mucosa were cells, from which 10% are goblet cells (Kim and Ho, 2010), and that the ER constitutes 10% of cell volume total volume (Alberts, 2002) the concentration of AGR2 in the goblet cell ER is about 460  $\mu$ M. IRE1 $\beta$ /α; AGR2<sup>+</sup> and AGR2 high expressing IRE1 $\beta$ /α; AGR2<sup>++</sup> cells had a concentration of 12  $\mu$ M and 140  $\mu$ M of AGR2 in their ER, respectively. (D) Quantification of reporter signals from IRE1 $\beta$ /α and IRE1α/α expressing dual UPR reporter CHO cells transiently transfected with BiP (mCherry as expression marker). Shown are the mean  $\pm$  SD of three independent repetitions. Statistical analysis was performed by two-sided unpaired Welch's *t* test and significance is indicated by asterisks (\*\**P* < 0.01).
